# Supplementary material
Source: MDPI journal article supplement (https://www.mdpi.com/1424-2818/9/4/48)
Supplement: s1 [file s1]

Table S3: Sequences DO 3765 *Alu* duplex 1

|                                                                                                                                             |
|---------------------------------------------------------------------------------------------------------------------------------------------|
| DO 3756 <i>Alu</i> 34 + (int) sequenced with <i>Alu</i> flanking forward primer and IAP.                                                    |
| Orientation: 5' -> 3'                                                                                                                       |
| GACTTGATCATTTTATCTTCAAAAAACAGTCAGCACGGCCGGGCGCGGTGGCTCACG<br>CCTGTAATCCCAGCACTTTGGGAGGCCGAGGCGGGCGGATCACGAGGTCAGGAGAT<br>CGAGACCATCCCGGCTAA |
| DO 3756 <i>Alu</i> + (int) sequenced with <i>Alu</i> flanking forward primer and IAP                                                        |
| Orientation: 5' -> 3'                                                                                                                       |
| TCTAAGGTACTTTGGCCGGGCGCGGTGGCTCACGCCTGTAATCCCAGCACTTTGGGA<br>GGCCGAGGCGGGCGGATCACGAGGTCAAGAGATCGAGACCTAGCGG                                 |
| DO 3756 <i>Alu</i> 9 - (absence) sequenced with both <i>Alu</i> flanking primers                                                            |
| Orientation: 5' -> 3'                                                                                                                       |
| CTTCTAAAGAAGATCTTTCCTCCAGTTGCCAGTGCTCTGGAAGGCCAATTTCCATGC<br>ACATTGTTACTTGAATTTGCATTTT                                                      |
| DO 3756 <i>Alu</i> 34 - (absence) sequenced with both <i>Alu</i> flanking primers                                                           |
| Orientation: 5' -> 3'                                                                                                                       |
| GACTTGATCATTTTATCTTCAAAAAACAGTCAGCACAAATACTAAAATCCATTCC                                                                                     |
