# Supplementary material
Source: MDPI journal article supplement (https://www.mdpi.com/1424-2818/9/4/48)
Supplement: s1 [file s1]

Table S2: Used *Alu* loci, accession numbers, genomic position and orientation within the genome

| <b>Locus</b>  | <b>Accession numbers</b> | <b>genomic position</b> |                     | <b>orientation</b> |
|---------------|--------------------------|-------------------------|---------------------|--------------------|
| <i>Alu_9</i>  | GenBank:AC114400.2       | Chr. 3                  | 59139464-59139923   | reverse            |
| <i>Alu_19</i> | GenBank:AC010739.3       | Chr. 2                  | 41715422-41715869   | reverse            |
| <i>Alu_34</i> | GenBank:AC004534.1       | Chr. 7                  | 144349104-144349540 | forward            |
| <i>Alu_35</i> | GenBank:AL357137.7       | Chr. 1                  | 115928434-115928869 | reverse            |
