# Supplementary material
Source: MDPI journal article supplement (https://www.mdpi.com/1424-2818/9/4/48)
Supplement: s1 [file s1]

Table S1: Individuals, bone number, used bone or tooth, estimation of DNA preservation and amount of DNA of each extract

| Individual               | Bone no.   | Bone               | Estimation of DNA preservation* | Amount of DNA [µg/µl] |
|--------------------------|------------|--------------------|---------------------------------|-----------------------|
| DO RG/BS/DS 1482 (M3)    | DO 1911    | left femur         | 100%                            | 4,99                  |
| DO BS 3706 (F5/F11)      | DO 3756    | left femur         | 100%                            | no data               |
| DO FK/RG 905.01 (M14)    | DO 905.01  | left femur         | 86%                             | no data               |
| DO RG/FK/KS 58.08 (M7)   | DO 58.08   | right femur        | 81%                             | 15,83                 |
| DO BS 3628 (F3)          | DO 2255.03 | right humerus      | 64%                             | 9,28                  |
| DO RG 66.02              | DO 66.02   | left femur         | 61%                             | 10,21                 |
| DO HS/GK/BS 1471         | DO 1471    | left femur         | 44%                             | 11,58                 |
| DO HS/GK 1548.01         | DO 1548.01 | right tibia        | 39%                             | 13,69                 |
| DO RG/FK 57.02 (M17/M19) | DO 58.13   | left humerus       | 18%                             | 13,07                 |
| DO RG/BS 187             | DO 187     | right humerus      | 27%                             | 15,93                 |
| DO FK/RG/HS 902.01 (M10) | DO 902.01  | left femur         | 100%                            | 9,23                  |
| DO RG/FK 1076 (M1)       | DO 1076    | left femur         | 100%                            | 9,78                  |
| EL13                     | -          | right petrous bone | 100%                            | no data               |
| EL158                    | -          | tooth: 45          | 100%                            | 16,42                 |
| HL1463                   | -          | tooth: 26          | 100%                            | 2,59                  |
| HL1751                   | -          | tooth: 25          | 100%                            | 5,84                  |

\* Estimation of DNA preservation is based on previous results of STR typing results in [55]. Percentage shows the average of how many alleles of the genetic fingerprint could be amplified. This means a high percentage indicates a high degree of DNA preservation, whereas a low percentage indicates a low degree of DNA preservation.
