# Supplementary material
Source: MDPI journal article supplement (https://www.mdpi.com/1424-2818/9/4/48)
Supplement: s1 [file s1]

Table S4: STR typings using six autosomal markers, a marker for the sex-discriminating amelogenin gene, and their amplicon sizes

| STR system       | Amelogenin | D13S317 | D21S11      | D18S51    | TH01    | D5S818  | FGA       |
|------------------|------------|---------|-------------|-----------|---------|---------|-----------|
| Amplicons (bp)   | 86 and 92  | 103-131 | 170-196     | 152-196   | 87-103  | 109-145 | 149-179   |
| Sample           |            |         |             |           |         |         |           |
| DO 1911 cons     | X/Y        | 12/-    | 30.2/32.2   | 15/17     | 9.3/-   | 11/12   | 21/22     |
| DO 1911 Ex19_1   | X/Y        | 12/-    | 30.2/32.2   | 15/17     | 9.3/-   | 11/12   | 21/22     |
| DO 1911 Ex19_2   | X/Y        | 12/-    | 30.2/32.2   | 15/17     | 9.3/-   | 11/12   | 21/22     |
| DO 3756 cons     | X/-        | 8/9     | 28/29       | 16/-      | 9/9.3   | 12/-    | 21/23     |
| DO 3756 Ex22_1   | X/-        | 8/9     | 28/29       | 16/-      | 9/9.3   | 12/-    | 21/23     |
| DO 3756 Ex22_2   | X/-        | 8/9     | 28/29       | 16/-      | 9/9.3   | 12/-    | 21/23     |
| DO 905.01 cons   | X/Y        | 8/11    | 29/31.2     | 18/19     | 7/9     | 11/12   | 20/22     |
| DO 905.01 Ex6_1  | X/Y        | 8/11    | (29)/(31.2) | 18/19     | 7/9     | 11/12   | 20/(22)   |
| DO 905.01 Ex6_2  | X/Y        | 8/11    | 29/31.2     | 18/19     | 7/9     | 11/12   | 20/22     |
| DO 58.08 cons    | X/-        | 8/12    | 28/30       | 14/16     | 9.3/-   | 11/12   | 20/24     |
| DO 58.08 Ex9_1   | (X)/-      | 8/12    | -/-         | 16/-      | 9.3/-   | -/-     | -/-       |
| DO 58.08 Ex9_2   | X/-        | 8/12    | 28/-        | 14/-      | 9.3/-   | -/-     | 20/24     |
| DO 2255.03 cons  | X/-        | 11/-    | 30/33.2     | 14/15     | 7/9.3   | 9/11    | 20/21     |
| DO 2255.03 Ex5_1 | X/-        | 11/-    | 30/33.2     | 15/-      | 7/9.3   | 11/-    | 20/-      |
| DO 2255.03 Ex5_2 | X/-        | 11/-    | 30/33.2     | 15/-      | 7/-     | 9/-     | 21/-      |
| DO 66.02 cons    | X/-        | 8/12    | 28/29       | 14/16     | 9.3/-   | 11/12   | 20/25     |
| DO 66.02 Ex5_1   | X/-        | 8/12    | -/-         | (14)/-    | (8)/9.3 | (11)/-  | (20)/-    |
| DO 66.02 Ex5_2   | X/-        | 8/12    | 29/-        | 14/16     | 9.3/-   | 12/-    | ((20))/25 |
| DO 1471 cons     | X/Y        | 11/13   | 28/29       | (13)/(20) | 9/9.3   | 12/-    | (20)/(24) |
| DO 1471 Ex7_1    | X/-        | -/-     | -/-         | -/-       | 9/9.3   | 12/-    | -/-       |
| DO 1471 Ex7_2    | X/-        | 8/-     | 29/-        | 15/-      | 9/9.3   | 12/-    | 24/-      |
| DO 1548.01 cons  | X/Y        | 11/13   | 27/28       | 13/14     | 9.3     | 9/10    | 20/21     |
| DO 1548.01 Ex8_1 | X/Y        | 11/13   | -/-         | ((14))/-  | 9.3/-   | 9/-     | ((20))/-  |
| DO 1548.01 Ex8_2 | X/Y        | 11/13   | 28/-        | 14/-      | 9.3/-   | 9/10    | 20/21     |
| DO 58.13 cons    | X/Y        | 8/13    | 28/29       | 14/15     | 7/9.3   | 12/13   | 23/25     |
| DO 58.13 Ex9_1   | (X)/Y      | 8/13    | -/-         | 14/-      | -/-     | -/-     | -/-       |
| DO 58.13 Ex9_2   | X/-        | -/-     | -/-         | -/-       | -/-     | 12/-    | (23)/-    |
| DO 187 cons      | X/-        | 12/14   | 29/-        | 12/14     | 6/9.3   | 11/13   | 22/23     |
| DO 187 Ex6_1     | X/-        | -/-     | -/-         | -/-       | -/-     | -/-     | -/-       |
| DO 187 Ex6_2     | -/-        | -/-     | -/-         | -/-       | -/-     | -/-     | 20/-      |
| DO 1076 Ex4-7    | X/Y        | 11/13   | 30.2/33.2   | 14/20     | 9.3/-   | 10/12   | 21/25     |
| DO 1076 Ex4-7_2  | X/Y        | 11/13   | 30.2/33.2   | 14/20     | 9.3/-   | 10/12   | 21/25     |
| DO 1076 cons     | X/Y        | 11/13   | 30.2/33.2   | 14/20     | 9.3/-   | 10/12   | 21/25     |

Incongruent alleles are shown in red

| STR system        | Amelogenin | D13S317 | D21S11       | D18S51 | TH01  | D5S818 | FGA     |
|-------------------|------------|---------|--------------|--------|-------|--------|---------|
| Sample            |            |         |              |        |       |        |         |
| DO 902.01 cons    | X/Y        | 9/13    | 31.2/32.2    | 10/12  | 6/9.3 | 12/-   | 22/24   |
| DO 902.01 Ex6-9   | X/Y        | 9/13    | 31.2/32.2    | 10/12  | 6/9.3 | 12/-   | 22/24   |
| DO 902.01 Ex6-9_2 | X/Y        | 9/13    | 31.2/32.2    | 10/12  | 6/9.3 | 12/-   | 22/24   |
| EL 13 cons        | X/Y        | 8/12    | (28)/29/31.2 | 12/14  | 6/9.3 | 11/13  | 22/(23) |
| EL 13 Ex2_2       | X/Y        | 8/12    | 29/31.2      | 12/14  | 6/9.3 | 11/13  | 22/-    |
| EL 158 Kcons      | X/Y        | 12/-    | 30/31/32     | 16/-   | 7/-   | 11/-   | 24/25   |
| EL 158 Ex2_2      | X/Y        | 12/-    | 30/31/32     | 16/-   | 7/-   | 11/-   | 24/25   |
| HL 1463 Oktaplex  | X/X        | 11/12   | 28/-         |        |       | 11/12  | 20/21   |
| HL 1463_2         | X/X        | 11/12   | 28/-         | 16/19  | 6/9.3 | 11/12  | 20/21   |
| HL 1751 Oktaplex  | X/X        | 12/-    | 28/29        |        |       | 12/13  | 20/23   |
| HL 1751_2         | X/X        | 12/-    | 28/29        | 13/15  | 7/9.3 | 12/13  | 20/23   |
| PC                | X/Y        | 11/12   | 27/29        | 13/16  | 6/7   | 10/12  | 20/22.2 |

Incongruent alleles are shown in red
